# Supplementary material for: Thrombin Preconditioning Enhances Therapeutic Efficacy of Human Wharton’s Jelly–Derived Mesenchymal Stem Cells in Severe Neonatal Hypoxic Ischemic Encephalopathy
Source: MDPI journal article supplement (doi:10.3390/ijms20102477), 2019-05-20
Supplement: s1 [file s1]

## Supplementary Materials

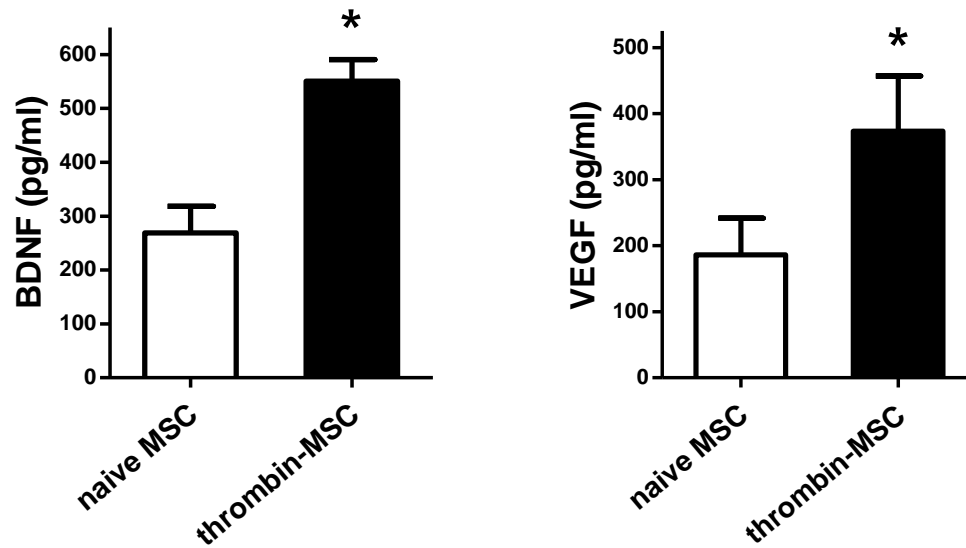

**Supplementary Figure S1.** Enhanced protein levels of brain-derived neurotrophin factor (BDNF) and vascular endothelial growth factor (VEGF) after thrombin preconditioning in human Wharton's jelly-derived MSCs (n = 6/ group). Data are mean  $\pm$  SD. \* P < 0.05 vs. naïve MSC group

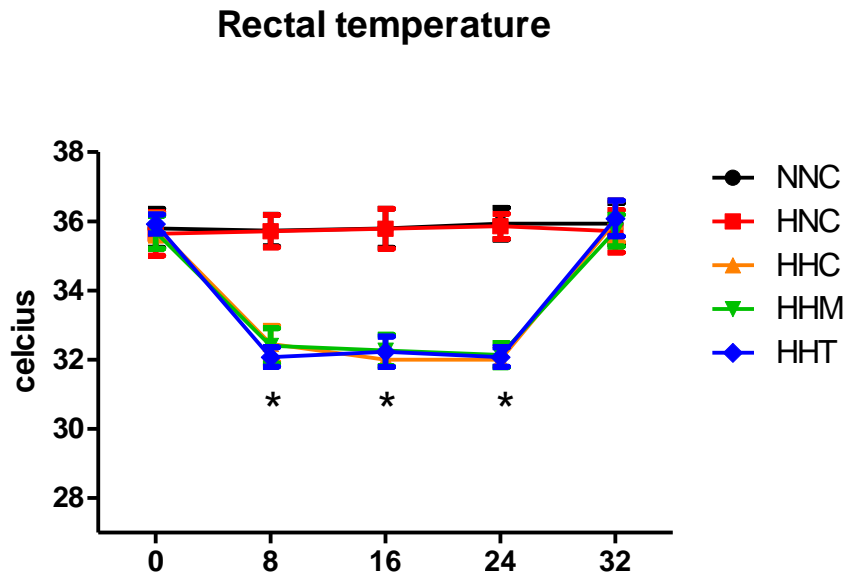

**Supplementary Figure S2.** Rectal temperature in experimental groups. Temperatures in each group remained stable during the intervention and were significantly different between normothermia and hypothermia groups at each measurement.  $n = 19, 45, 30, 44$  and  $40$ , NNC, HNC, HHC, HHM and HHT, respectively. Data are mean  $\pm$  SD. NNC, normal+normothermia control; HNC, HIE + normothermia control; HHC, HIE + hypothermia control; HHM, HIE + hypothermia + naïve MSCs; HHT, HIE + hypothermia + thrombin-primed MSCs. \*  $P < 0.05$  vs. normothermia groups (NNC and HNC).

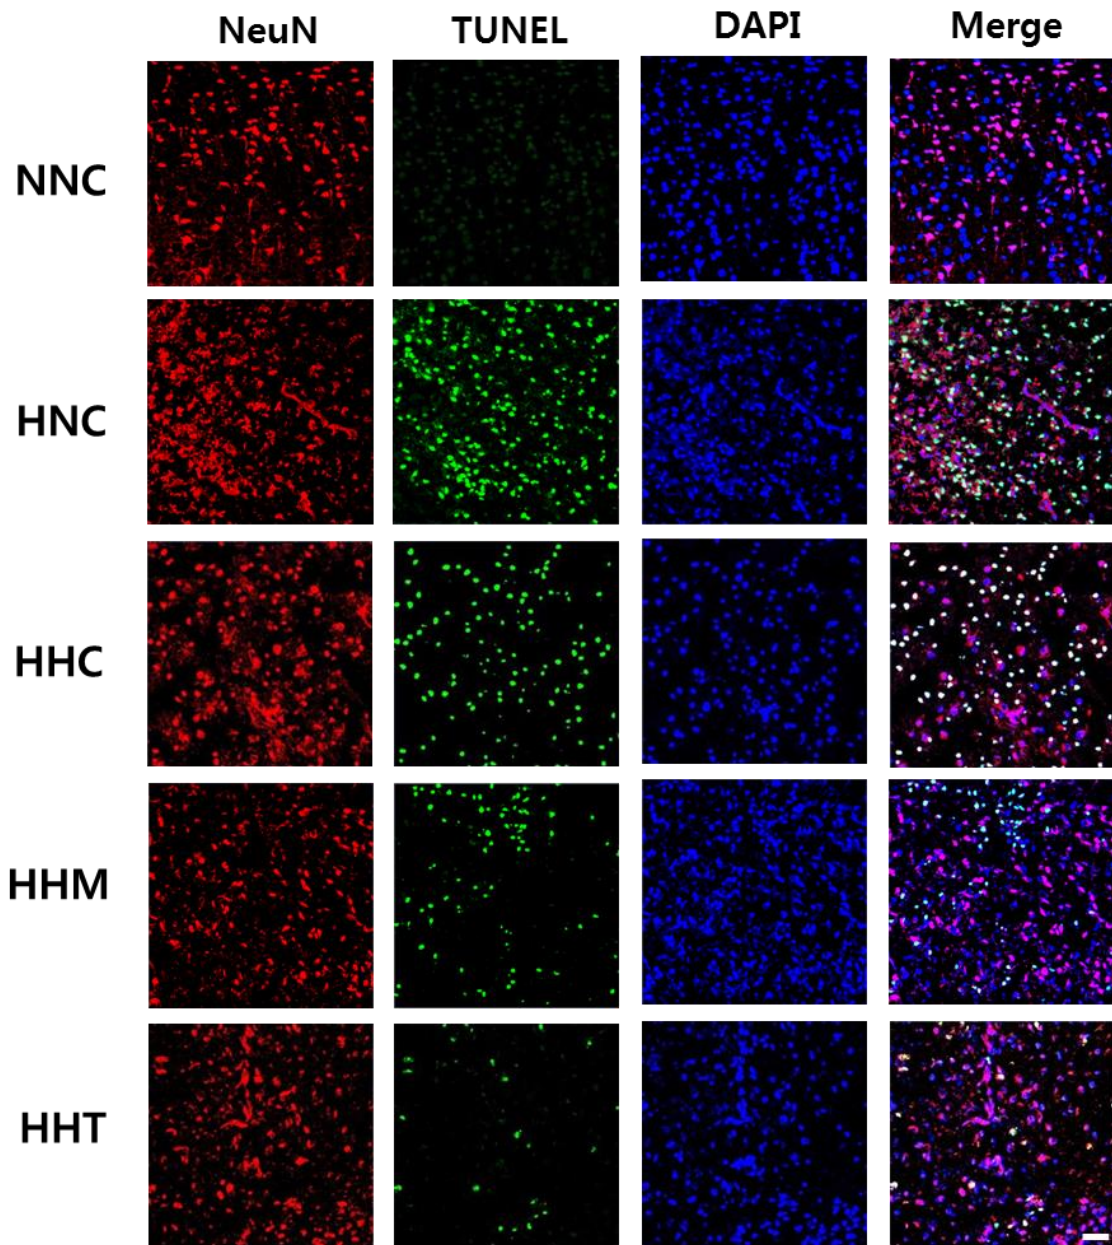

**Supplementary Figure S3.** Penumbra area of rat HIE brain tissues double-stained with neuronal nuclei (NeuN, red) and terminal deoxynucleotidyl transferase-mediated dUTP nick end-labeling (TUNEL, green). DNA was counter-stained with 4',6-diamidino-2-phenylindole (DAPI, blue) (original magnification;  $\times 200$ , scale bars; 50  $\mu\text{m}$ ). NNC, normal+normothermia control; HNC, HIE + normothermia control; HHC, HIE + hypothermia control; HHM, HIE + hypothermia + naïve MSCs; HHT, HIE + hypothermia + thrombin-primed MSCs. \*  $P < 0.05$  vs. normothermia groups (NNC and HNC).
